# Supplementary material for: (±)-3-Deoxyradicinin Induces Stomata Opening and Chloroplast Oxidative Stress in Tomato (Solanum lycopersicum L.)
Source: MDPI journal article supplement (doi:10.3390/ijms24108467), 2023-05-09
Supplement: s1 [file s1]

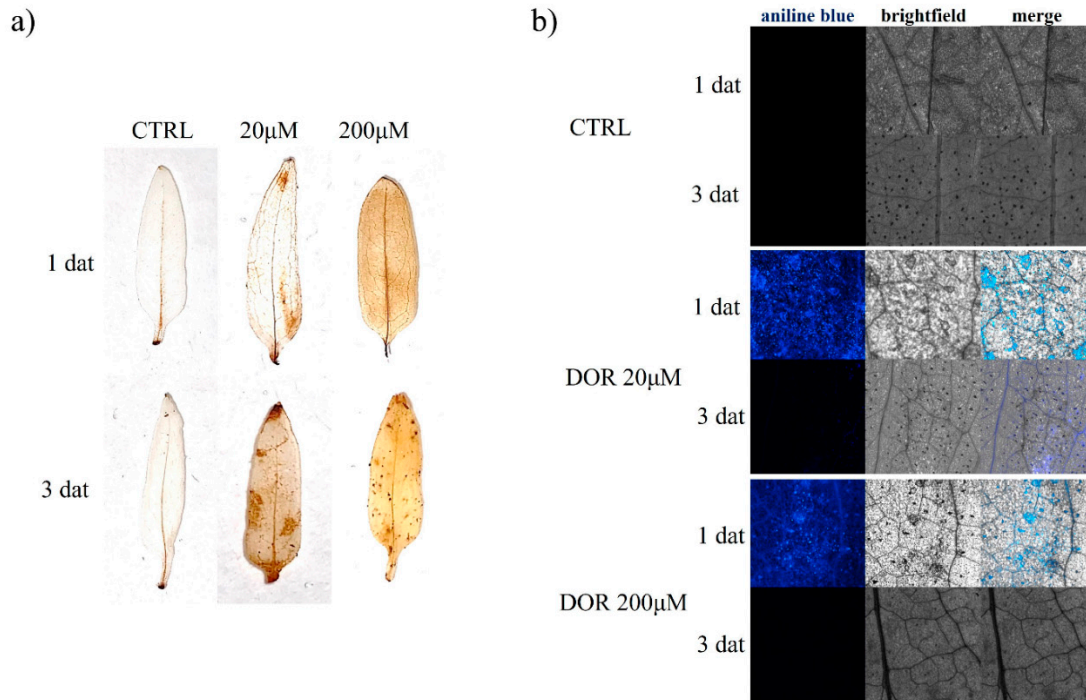

**Figure S1.** DAB staining (a) and callose deposition (b) of DOR-treated tomato leaves. a) Leaves from two-week-old tomato plants were detached and placed in a 24-well tissue-culture plate with 500  $\mu$ l of 20 or 200  $\mu$ M DOR for 1 or 3 days. After treatment, leaves were stained with DAB, as reported in section 3.6 and observed under an optical microscope at 4x magnification. b) Leaves from two-week-old tomato plants were detached and placed in a 24-well tissue-culture plate with 500  $\mu$ l of 20 or 200  $\mu$ M DOR, for 1 or 3 days. After treatment, leaves were stained with 0.01% anilin blue as described in section 3.8 and observed under an optical microscope at 10x magnification. Images are representative of three independent experiments; dat: days after treatment.

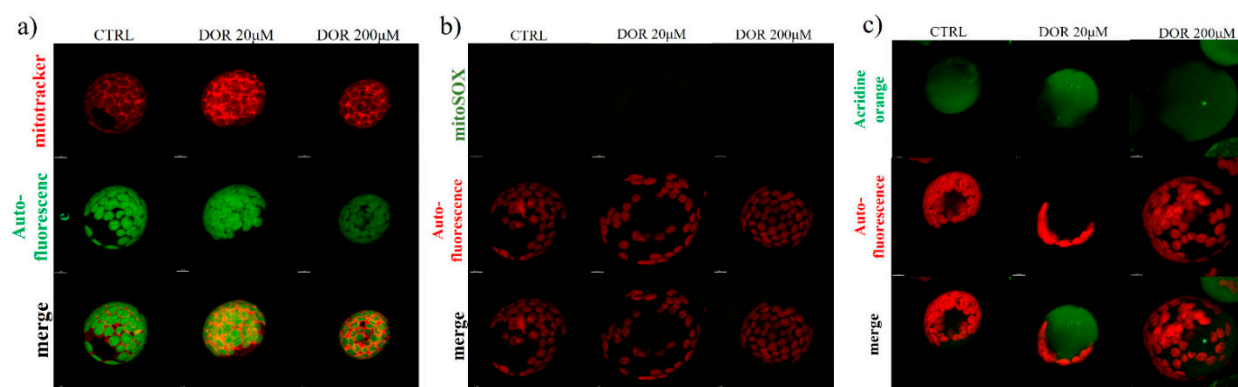

**Figure S2.** Confocal microscope images of mitochondrial network (a), mitochondria-derived ROS (b) and vacuole (c) of protoplasts treated with DOR. a) Protoplasts from leaves of two-week-old tomato plants were treated with 20 or 200  $\mu\text{M}$  DOR for 1 h, incubated with 1  $\mu\text{M}$  MitoTracker and analyzed under a confocal microscope at 579 nm excitation and 599 nm emission, for mitochondria imaging. b) Protoplasts from leaves of two-week-old tomato plants were treated with 20 or 200  $\mu\text{M}$  DOR for 1 h, incubated with 3  $\mu\text{M}$  MitoSOX and analyzed under a confocal microscope at 510 nm excitation and 580 nm emission, for mitochondrial ROS imaging. c) Protoplasts from leaves of two-week-old tomato plants were treated with 20 or 200  $\mu\text{M}$  DOR for 1 h, incubated with 3  $\mu\text{M}$  acridine orange and analyzed under a confocal microscope at 488 nm excitation and 526 nm emission, for vacuole imaging. Bar = 7  $\mu\text{m}$ .

**Table S1.** List of oligonucleotides used in qRT-PCR analysis of chloroplast-triggered cell death gene expression of tomato leaves treated with DOR.

| Gene             | Primer sense 5'-3'   | Primer antisense 5'-3' |
|------------------|----------------------|------------------------|
| <i>SolycUBI3</i> | TCTTCCGACACCATCGACAA | AGAACTGCAACACAGTGAGC   |
| <i>SolycACT</i>  | CAGCAGATGTGGATCTCAA  | CTGTGGACAATGGAAGGAC    |
| <i>SolycACD2</i> | GCACTGAACATGACAGTCC  | CATGAGAAGGCAGAGTACAAGG |
| <i>SolycEX1</i>  | GAAGAGAAAGCCAGTTCAGC | GCTACGTTGACCTTGAAGCC   |
